CORRECTION

# Correction: Smoking Is Associated with an Increased Risk of Dementia: A Meta-Analysis of Prospective Cohort Studies with Investigation of Potential Effect Modifiers

The *PLOS ONE* Staff

There is an error in affiliation 1 for authors Guochao Zhong and Yi Wang. Affiliation 1 should be: No.2 Office of Student Affairs, Chongqing Medical University, Chongqing, China.

## Reference

1. Zhong G, Wang Y, Zhang Y, Guo JJ, Zhao Y (2015) Smoking Is Associated with an Increased Risk of Dementia: A Meta-Analysis of Prospective Cohort Studies with Investigation of Potential Effect Modifiers. *PLoS ONE* 10(3): e0118333. doi: [10.1371/journal.pone.0118333](https://doi.org/10.1371/journal.pone.0118333) PMID: [25763939](https://pubmed.ncbi.nlm.nih.gov/25763939/)

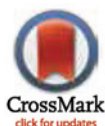

## OPEN ACCESS

**Citation:** The *PLOS ONE* Staff (2015) Correction: Smoking Is Associated with an Increased Risk of Dementia: A Meta-Analysis of Prospective Cohort Studies with Investigation of Potential Effect Modifiers. *PLoS ONE* 10(4): e0126169. doi:[10.1371/journal.pone.0126169](https://doi.org/10.1371/journal.pone.0126169)

**Published:** April 13, 2015

**Copyright:** © 2015 The PLOS ONE Staff. This is an open access article distributed under the terms of the [Creative Commons Attribution License](https://creativecommons.org/licenses/by/4.0/), which permits unrestricted use, distribution, and reproduction in any medium, provided the original author and source are credited.
